# Supplementary material for: Host Range and Loop-Mediated Isothermal Amplification Detection of Globisporangium sylvaticum from Guizhou, China
Source: MDPI journal article supplement (doi:10.3390/jof9070752), 2023-07-15
Supplement: s1 [file s1]

## Supplementary Material

**Table S1.** The PCR primers and PCR systems used in this study.

| PCR regions | Primers (5'-3') |                              | PCR mixtures (25 µL) |        |             |                   |                      | PCR conditions  |                |                |                |                 | References |
|-------------|-----------------|------------------------------|----------------------|--------|-------------|-------------------|----------------------|-----------------|----------------|----------------|----------------|-----------------|------------|
|             |                 |                              | Ex Taq buffer        | dNTPs  | Each primer | Ex Taq polymerase | Bovine serum albumin | Predenaturation | 35 cycles      |                |                | Final extension |            |
|             |                 |                              |                      |        |             |                   |                      |                 | Denaturation   | Annealing      | extension      |                 |            |
| ITS         | ITS 5           | GGAAGTAAAAGT<br>CGTAACAAGG   | 1×                   | 0.2 mM | 0.2 µM      | 0.625 U           | 0.4 mg               | 94°C for 3 min  | 94°C for 30 s  | 55°C for 30 s  | 72°C for 1 min | 72°C for 10 min | [?]        |
|             | ITS 4           | TCCTCCGCTTATT<br>GATATGC     |                      |        |             |                   |                      |                 |                |                |                |                 |            |
| cox1        | OomCoxI-Levup   | TCAWCWMGATG<br>GCTTTTTTCAAC  | 1×                   | 0.2 mM | 0.5 µM      | 0.625 U           | 0.4 mg               | 94°C for 3 min  | 94°C for 1 min | 55°C for 1 min | 72°C for 1 min | 72°C for 10 min | [?]        |
|             | OomCoxI-Levlo   | CYTCHGGRTGWC<br>CRAAAAACCAAA |                      |        |             |                   |                      |                 |                |                |                |                 |            |
| Detection   | For             | TTCAAACCCCAT<br>ACCTAACTT    | 1×                   | 0.2 mM | 0.2 µM      | 0.625 U           | 0.4 mg               | 94°C for 3 min  | 94°C for 30 s  | 58°C for 30 s  | 72°C for 1 min | 72°C for 10 min | This study |
|             | Rev             | CGCAAGTTGTGC<br>ATAAACAA     |                      |        |             |                   |                      |                 |                |                |                |                 |            |

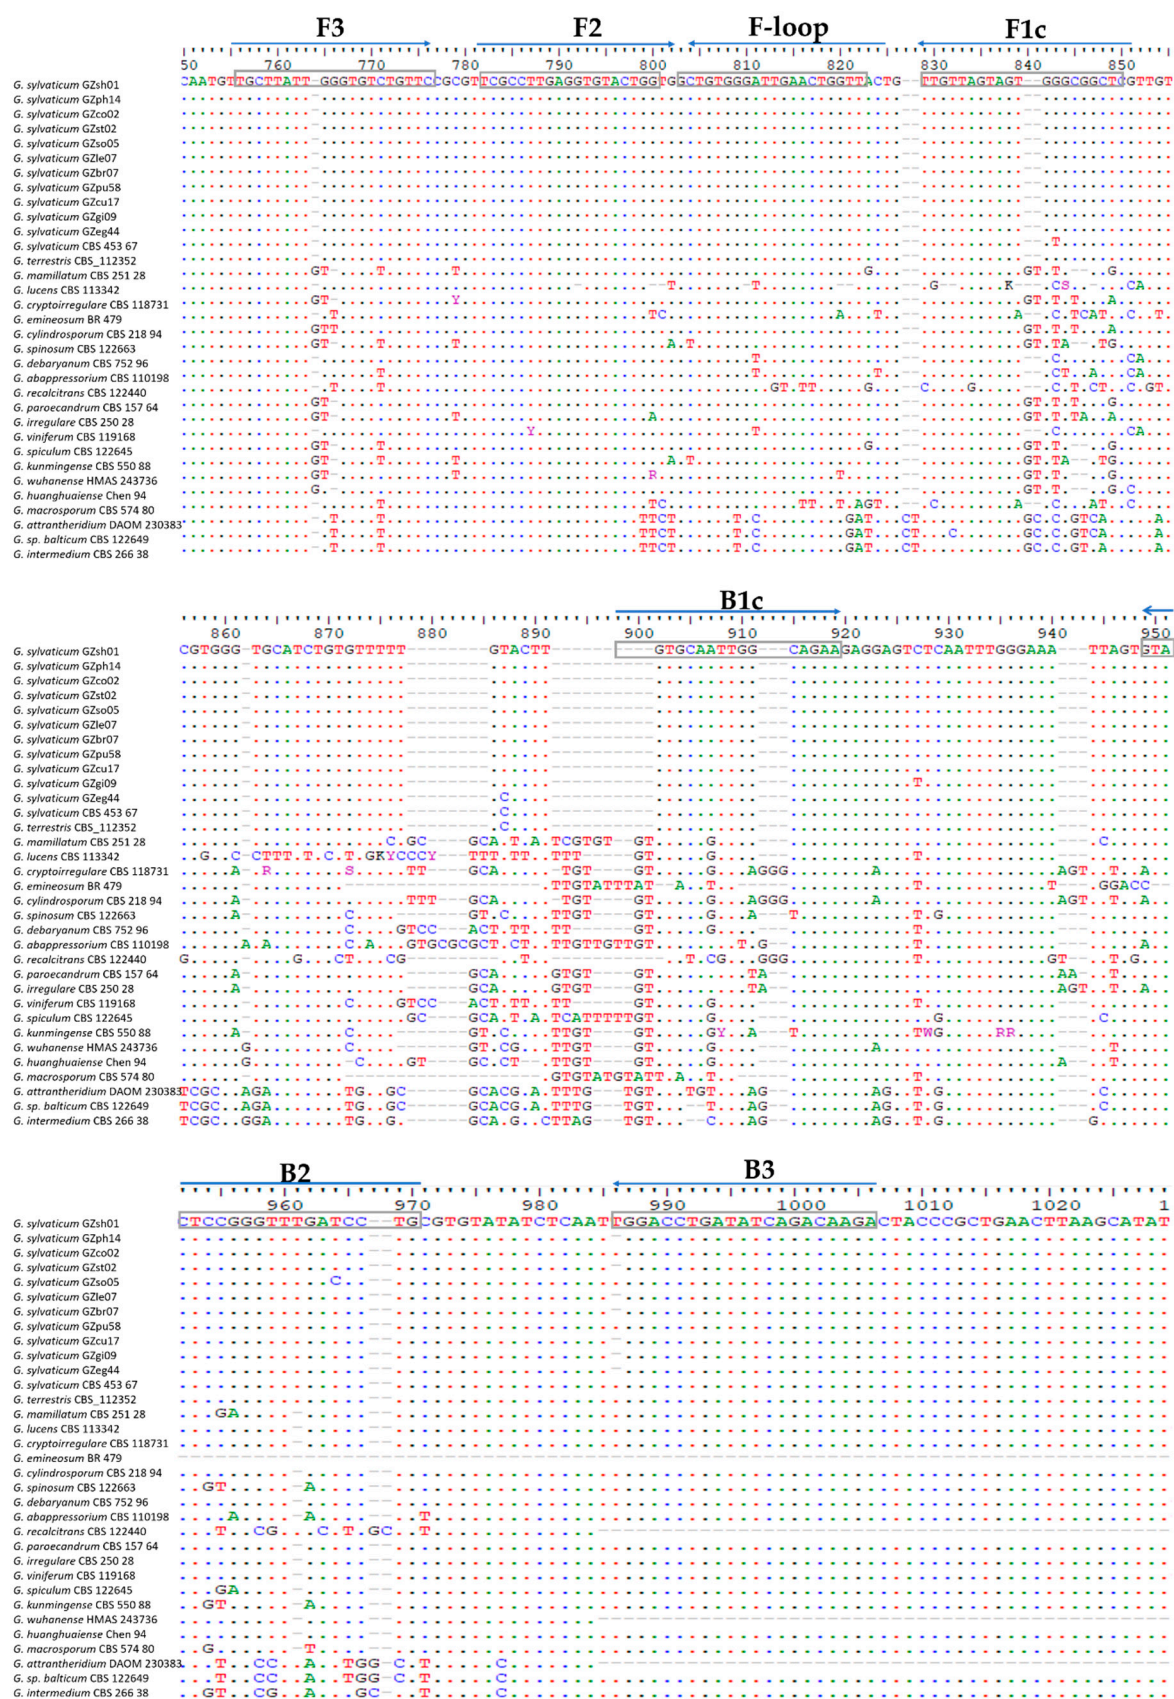

**Figure S1.** Design of LAMP primers specific for *Globisporangium sylvaticum* based on ITS sequences. Nucleotide sequence alignment of ITS sequences from *G. sylvaticum* and closely related isolates. Partial sequences of ITS and the location of six LAMP primers [F3, B3, FIP (F1c-F2), BIP (B1c-B2), and F-loop] are shown. Arrows indicate the direction of extension.

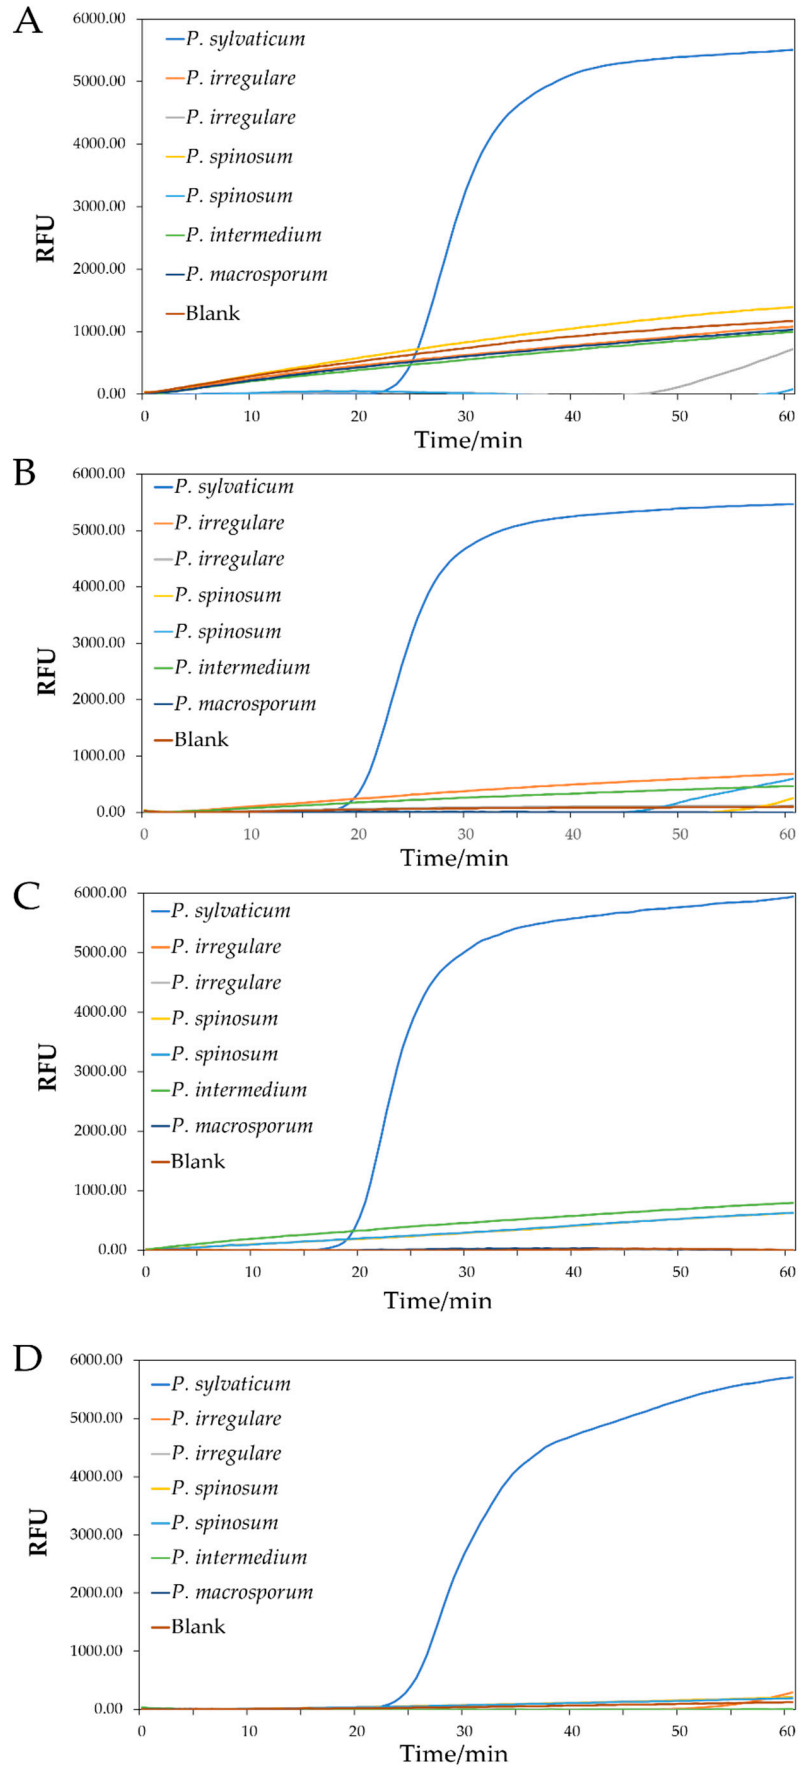

**Figure S2.** Specificity of the LAMP reaction at different temperatures: (A) 60 °C, (B) 62.5 °C, (C) 65 °C, and (D) 67.5 °C for 60 min.
